# Supplementary material
Source: PubMed Central journal article supplement (PMC3108852)

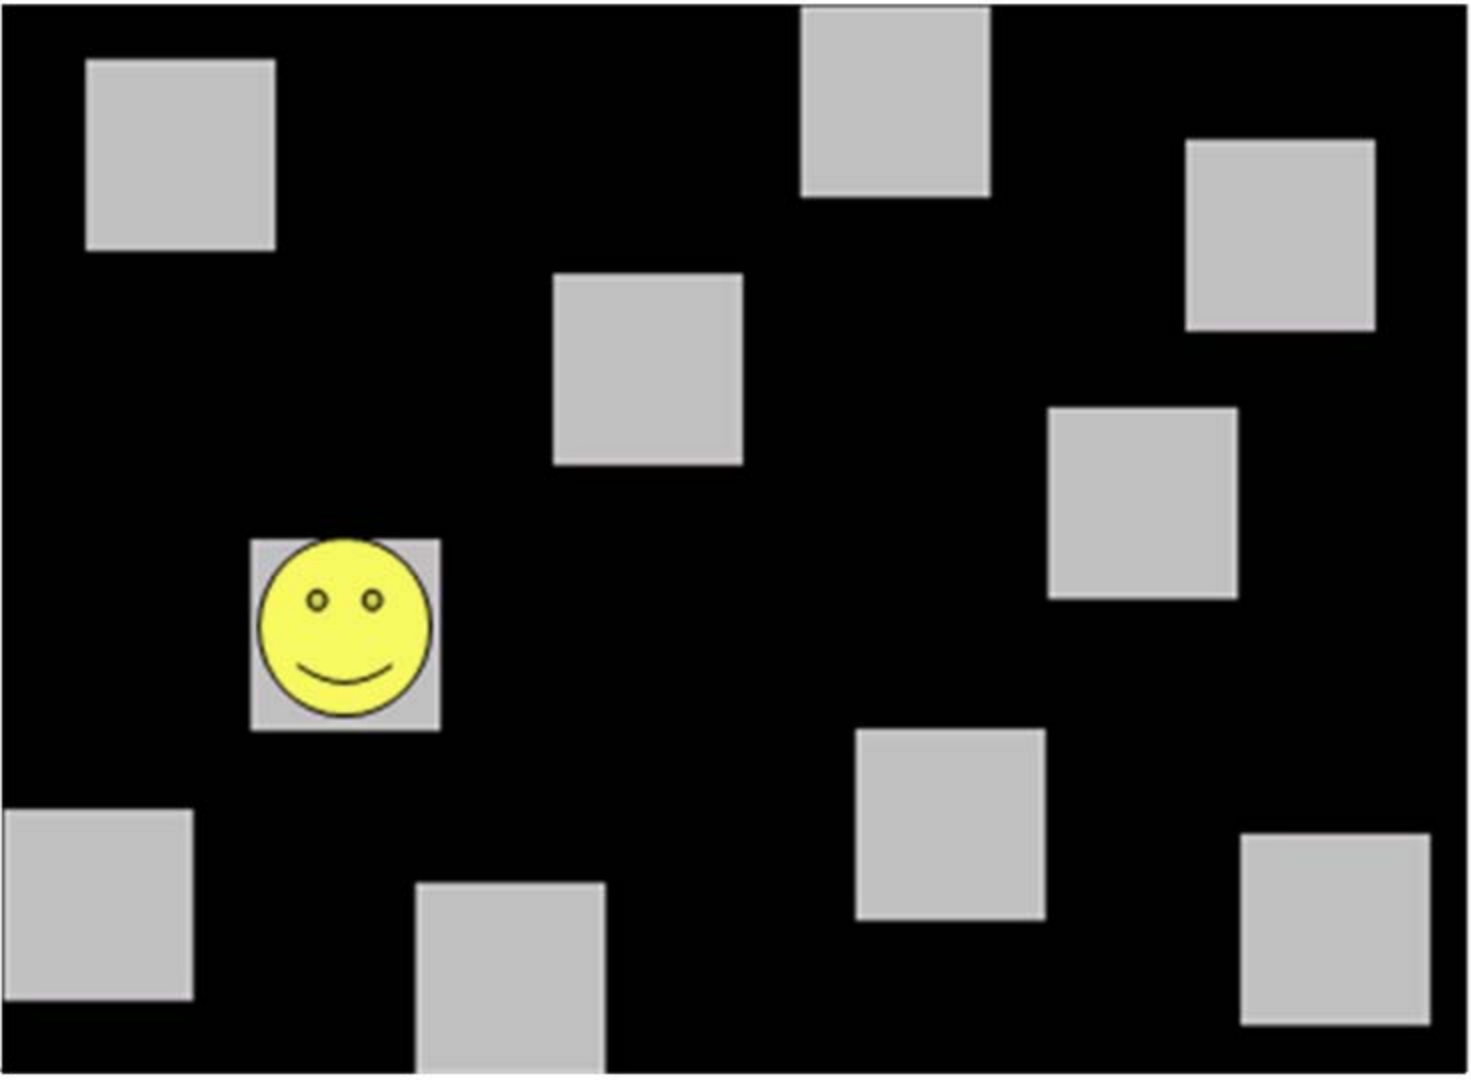

Supplement: NIHMS294299-supplement-01.pdf [file NIHMS294299-supplement-01.pdf]
